# Supplementary material for: Comparison of Four Immobilization Methods for Different Transaminases
Source: MDPI journal article supplement (doi:10.3390/catal13020300), 2023-01-28
Supplement: s1 [file s1]

Archive with 1 entries (1 files):
- catalysts-2132421-supplementary.pdf
